# Supplementary material
Source: PubMed Central journal article supplement (PMC2652345)

**Supplementary Figure 1:** Secondary structure of PN2-3. (A) Chemical shift deviations (CSD) from random coil values of H $\alpha$ , C $\alpha$  and C (carbonyl) of PN2-3 residues. Residues 29 to 51 present CSD characteristic of  $\alpha$ -helical conformation, i.e.  $^1\text{H}\alpha$  CSD < -0.1 ppm,  $^{13}\text{C}\alpha$  CSD > 0.7 ppm and carbonyl CSD > 0.5 ppm. In the PN2-3 sequence, boxed residues are predicted to be  $\alpha$ -helical by two secondary structure prediction algorithms or more. (B) Ribbon representation of 7 calculated “best” structures of PN2-3 based on TALOS-derived torsion angle constraints. The helical regions (F29-E51) of the backbones of these structures are superimposed (rmsd = 0.8 Å). The tubulin-binding domain (V10-K85) is colored in red.

# Supplementary figure 1

## A

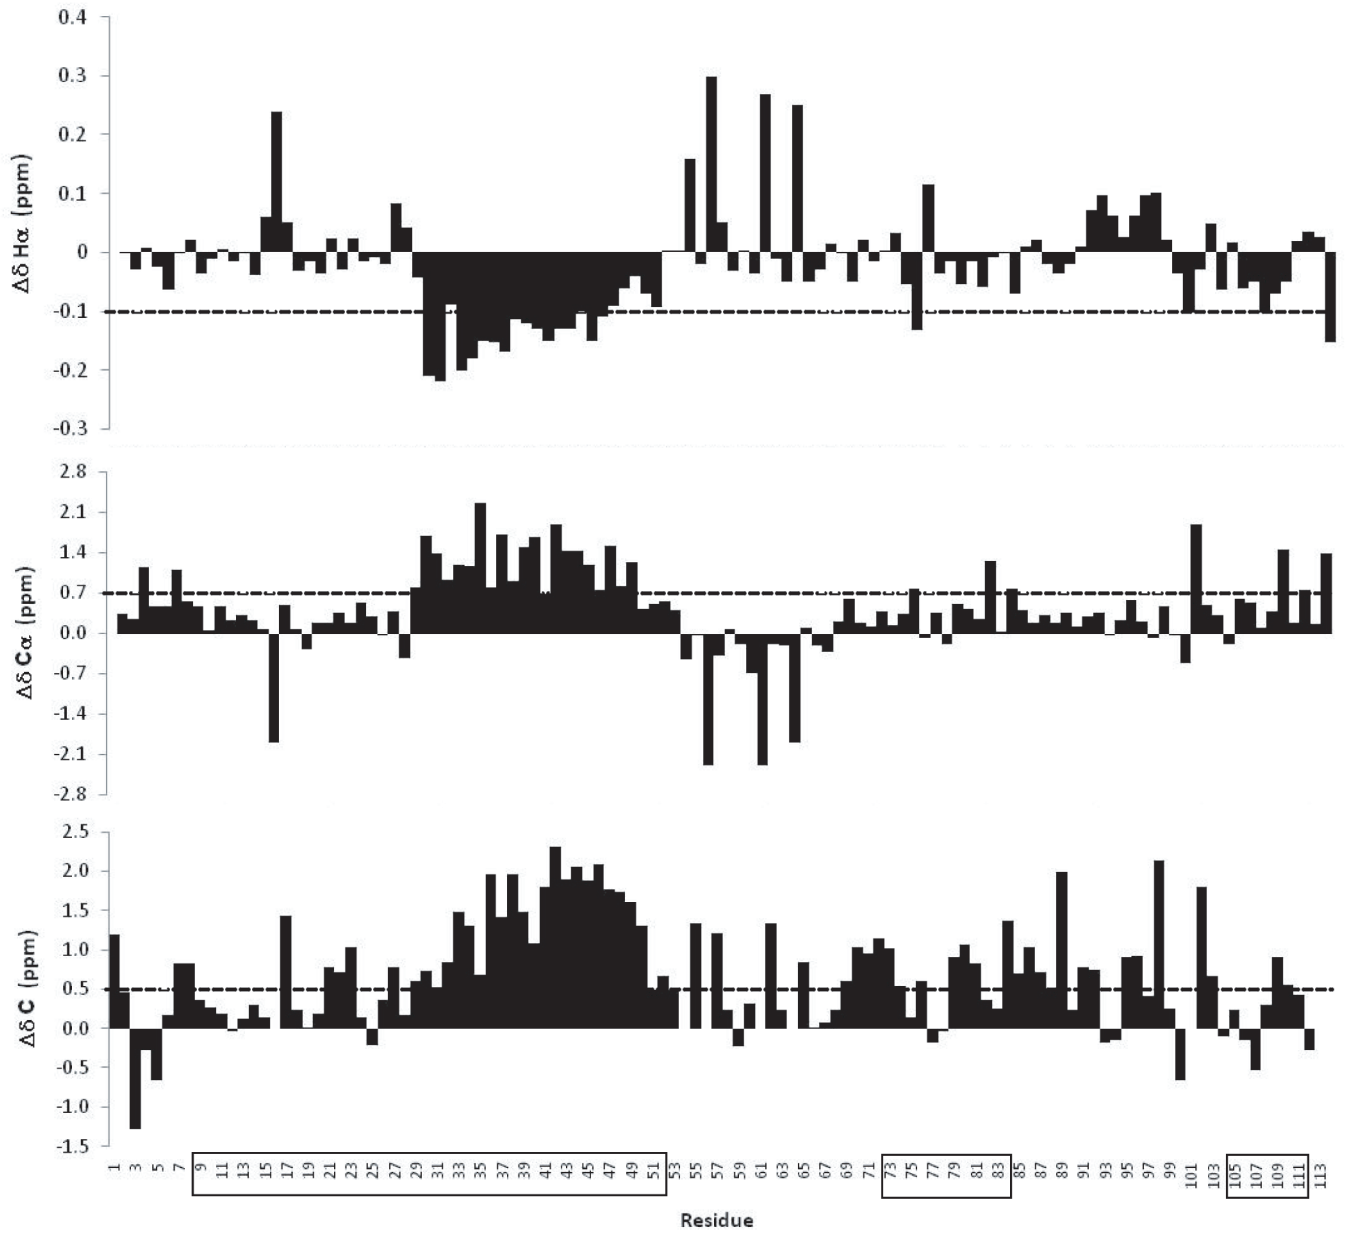

## B

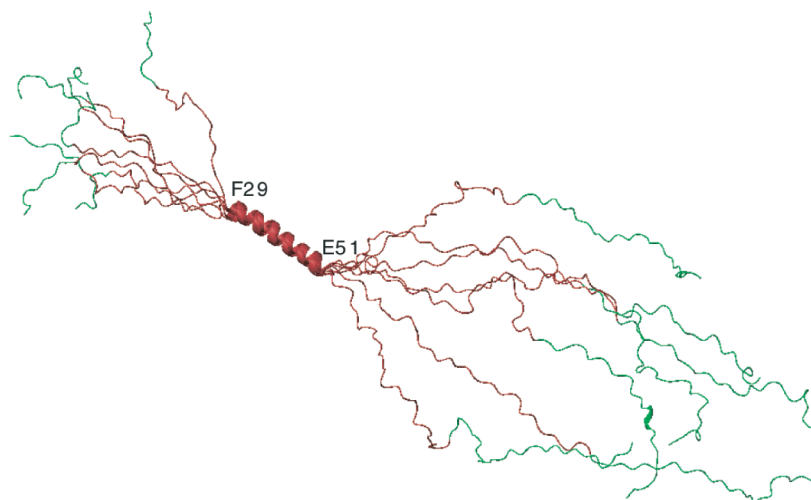

Supplement: M808249200_1.pdf [file M808249200_1.pdf]
